# Supplementary material for: A randomised controlled study of high intensity exercise as a dishabituating stimulus to improve hypoglycaemia awareness in people with type 1 diabetes: a proof-of-concept study
Source: Springer Nature journal article supplement (doi:10.1007/s00125-019-05076-5), 2020-01-15
Supplement: MOESM1 [file 17671208]

| Participant number | IAH  |        |       |
|--------------------|------|--------|-------|
|                    | Gold | Clarke | DAFNE |
| 1                  | 3    | 3      | 2     |
| 2                  | 4    | 4      | 1     |
| 3                  | 3    | 5      | 2     |
| 4                  | 4    | 7      | 2     |
| 5                  | 3    | 4      | 2     |
| 6                  | 6    | 4      | 2     |
| 7                  | 3    | 5      | 2     |
| 8                  | 5    | 8      | 3     |
| 9                  | 7    | 5      | 2     |
| 10                 | 4    | 6      | 2     |
| 11                 | 4    | 5      | 2     |
| 12                 | 1    | 3      | 2     |
| Mean               | 4    | 5      | 2     |

ESM Table 1: Validation of hypoglycaemia awareness; Gold, Clarke and DAFNE questionnaire results
